# Supplementary material
Source: PubMed Central journal article supplement (PMC9358393)
Supplement: EMMM-14-e16423-s001.pdf [file EMMM-14-e16423-s001.pdf]

# Disease modeling of a mutation in $\alpha$ -actinin 2 guides clinical therapy in hypertrophic cardiomyopathy

Maksymilian Prondzynski, Marc Lemoine, Antonia Zech, András Horváth, Vittoria di Mauro, Jussi Koivumäki, Nico Kresin, Josephine Busch, Tobias Krause, Elisabeth Krämer, Saskia Schlossarek, Michael Spohn, Felix Friedrich, Julia Münch, Sandra Laufer, Charles Redwood, Alexander Volk, Arne Hansen, Giulia Mearini, Daniele Catalucci, Christian Meyer, Torsten Christ, Monica Patten, Thomas Eschenhagen, and Lucie Carrier

**DOI: 10.15252/emmm.202216423**

*Corresponding author(s): Lucie Carrier (l.carrier@uke.de)*

---

|                         |                  |             |
|-------------------------|------------------|-------------|
| <b>Review Timeline:</b> | Submission Date: | 25th Feb 22 |
|                         | Review:          | 10th Mar 22 |
|                         | Accepted:        | 10th Jun 22 |

---

*Editor: Lise Roth*

## Transaction Report:

(Note: With the exception of the correction of typographical or spelling errors that could be a source of ambiguity, letters and reports are not edited. Depending on transfer agreements, referee reports obtained elsewhere may or may not be included in this compilation. Referee reports are anonymous unless the Referee chooses to sign their reports.)

Referee #2

I read through the letter. I agree the second site does not significantly change the findings. The phenomenon of losing one allele through premature truncation/NMD and having the second WT allele produce the normal amount of protein is well-described for many sarcomere genes/proteins. So the authors might want to add that this is another approach to fixing the underlying defect- knocking down the mutant allele.
